# Supplementary material for: Machine learning differentiates enzymatic and non-enzymatic metals in proteins
Source: PubMed Central journal article supplement (PMC8211803; doi:10.1038/s41467-021-24070-3), 2021-06-17
Supplement: 41467_2021_24070_MOESM3_ESM.pdf [file 41467_2021_24070_MOESM3_ESM.pdf]

## Description of Additional Supplementary Files

### Supplementary Data 1:

**a) Manually examined sites:** From the final dataset, 50 sites labelled enzymatic and 50 sites labelled non-enzymatic were randomly sampled for manual inspection using the PDB publication, UniProt, and PyMOL to check if they were metal ions at a catalytic site or non-catalytic site.

**b) Feature details:** A complete list of features used for machine learning, the category they belong to, and their calculated similarity.

**c) Feature set details:** All 67 feature set names and the features included in them.

**d) Incorrect predictions:** The test-set sites that were initially incorrectly predicted and our finding from manual inspection.

**e) Feature importance:** The relative importance output by our extra-trees MAHOMES model

**f) Manually annotated M-CSA:** The downloaded M-CSA data with our additional manual annotations. Also includes information for which enzymes and their homologs were removed during the enzymatic labelling process.

### Supplementary Data 2:

Final list of sites that were used during the ML process. *SITE\_ID* is that site index. *PDB ID* is the crystal structure containing the site. *Chain ID* is the polypeptide identifier for the chain that the site was bound to. *resName1*, *resName2*, *resName3*, and *resName4* are the three letter residue codes for the metal ions included in the site, left blank depending on the number of atoms in the site. *seqNum1*, *seqNum2*, *seqNum3*, and *seqNum4* are the sequence index in the PDB file for the metal ions included in the site. *Enzyme* is a true for sites identified by our pipeline to be enzymatic and false for those identified as non-enzymatic (the test-set sites found to be mislabeled are not corrected in this file). *Set* is 'data' for sites in the dataset and 'test' for sites in the test-set. *Resolution (Å)* is the crystal structures resolution. *PDB Dep. Date* is the date the structure was deposited in the PDB. *PDB Classification* and *PDB Macromolecular Name* are from the authors of the crystal structure. *EC No* is the downloaded EC number from the RCSB at the time of data collection. *Uniprot Acc* is the accession code(s) in the UniProt KB database for the polypeptide sequence. *Distance Site moved during relax (Å)* is the distance between the site's average location in the original and relaxed structure. *Homolog M-CSA ID* is the entry in the M-CSA database for the sequence homolog with the highest E-value, *M-CSA e\_val*, which was further used for enzymatic identification. *Homolog M-CSA aligned TM\_len*, *Homolog M-CSA aligned TM\_rmsd*, *Homolog M-CSA aligned TMscore*, *M-CSA TM\_seqID*, and *Homolog M-CSA aligned catalytic residue distance from site* are the results from aligning the site and its structure with the homolog for the corresponding M-CSA entry.

### Supplementary Data 3:

The sequence test-set. Each entry starts with a '>' followed by an identifier, which includes uniprot accession numbers and one of the *SITE\_ID*s bound to that sequence. The following Boolean value marks weather it is an enzymatic sequence or not. The next line starts the sequence in FASTA format.
